# Supplementary material for: Cortex-wide transcranial localization microscopy with fluorescently labeled red blood cells
Source: Springer Nature journal article supplement (doi:10.1038/s41467-024-47892-3), 2024-04-25
Supplement: 41467_2024_47892_MOESM4_ESM.pdf [file 41467_2024_47892_MOESM4_ESM.pdf]

Title: Supplementary Movie 1

Description: Hemodynamic responses in the murine brain under hindpaw stimulation across various vessel types captured with RBC-aided WFLM.

Title: Supplementary Movie 2

Description: Simultaneous neuro-vascular activation mapping of the murine brain under whisker stimulation captured with RBC-aided WFLM.
